# Supplementary material
Source: publisher figshare collection journal article supplement (https://geolsoc.figshare.com/ndownloader/files/27996898)
Supplement: Supplementary file 1 [file 27996898]

[Murchison, R.I. 1841d. A brief report on the geological journey across Russia in 1841. Letter from R. Murchison to His Excellency the Minister of Finance. *Mining Journal*, **4**(11–12), 145–160 (in Russian). [Мурчисон Р.И. 1841. Краткий отчет о геологическом путешествии по России в 1841 году. Письмо Г. Мурчисона к Его Сиятельству господину Министру Финансов // Горный журнал. 1841. Ч. 4. Кн. 11–12. С. 145–160.]]

ГОРНЫЙ ЖуРНАЛЪ,

чАСТЬ IV

КНИЖКА XI И XII.

ПЕЧАТАТЬ ПОЗВОЛЯЕТСЯ

съ тѣмъ, чтобы по отпечатаніи представлены были въ Ценсурный Комитетъ три экземпляра. С. Петербургъ, 5 Декабря 1841 года.

Ценсоръ С. Куторга.

- 145 –

**ГЕОлОГИя**

1.

Краткій отчетъ о геологическомъ путешествіи по Россіи въ 1841 году. Письмо Г. Мурчисона къ Его Сиятельству господину Министру Финансовъ.

Въ письмѣ, которымъ Ваше Сиятельству почтили меня въ Февралѣ сего года, Вамъ угодно было увѣдомить меня, что ГОСУДАРЬ ИМПЕРАТОРЪ удостоиваетъ своимъ высокимъ покровительствомъ Г. Вернеля и меня для геологическаго путешествія, которое мы желали предпринять по Россіи съ цѣлію распространенія изслѣдованій, начатыхъ нами въ прошедшемъ году. Это обѣщаніе не только было совершенно исполнено, но Его Величество ГОСУДАРЪ ИМПЕРАТОРЪ оказалъ намъ такой

- 146 –

милостивый пріемъ, все горное вѣдомство оказало намъ столько пособій, а Русскіе, съ которыми мы имѣли сношенія во время нашего путешествія, оказали намъ такое гостепріимство, что мы истинно счастливы, почитая себя преданными пользамъ вашего великаго народа и употребляя всѣ усилія для успѣховъ естественной исторіи Россіи.

Одушевленный сими чувствованіями, я осмѣливаюсь представить отъ себя и отъ моего сотрудника очеркъ результатовъ главнѣйшихъ нашихъ изысканій. Прежде всего намъ пріятно засвидѣтельствовать, что дѣятельное и благоразумное пособіе Горнаго Управленія, и мѣры, принятыя имъ для нашего путешествія, были первыми основаніями успѣха его, тогда какъ искреннее и ученое содѣйствіе Графа Кейзерлинга и Поручика Кокшарова, которыхъ Начальство Горное пріобщило къ нашей экспедиціи, столько же способствовало ся успѣху, какъ и наши усилія. Съ такими товарищами и со всѣми доставленными намъ средствами, трудъ предположенный нами былъ весьма облегченъ. Во время пятимѣсячной, безпрерывной работы, каждый членъ экспедиціи имѣлъ только одну цѣль и употреблялъ всѣ усилія для достиженія истины. Одушевленный тою же мыслію и раздѣляя тѣ же мнѣнія, каждый старался исполнить свою обязанность и единственная моя заслуга передъ другими въ томъ, что я

- 147 –

составилъ планъ нашей экспедиціи и время отъ времени сообщалъ новые способы практической геологіи для лучшаго достиженія цѣли. Дѣйствуя постоянно по превосходному маршруту, который былъ для насъ приготовленъ и, измѣняя сго только по обстоятельствамъ и открытіямъ неожиданнымъ, мы такъ соображали свои дѣйствія, что по мѣрѣ встрѣчи чего либо сомнительнаго, тотчасъ принимались новыя мѣры для его устраненія. Этимъ соглашеніемъ дѣйствій мы умножали наши силы, удвоивали наши наблюденія и собрали такимъ образомъ такое количество фактовъ, которое потребовало бы двухъ-лѣтняго путешествія отъ иной экспедиціи, если бы она не могла раздѣляться на партіи, подобно нашей.

Предметами нашего путешествія были, какъ Ваше Сиятельству знаете:

1) Классировать и опредѣлить относительную древность и послѣдовательность различныхъ горныхъ породъ, составляющихъ Уральскій хребетъ.

2) Обратить особенное вниманіе на Донецкій каменноугольный бассейнъ и опредѣлить его точное соотношеніе съ равнозначущею формаціею въ Англіи.

3) Осмотрѣть столько мѣстностей на югѣ и въ центрѣ Россіи, сколько можно, для

- 148 –

собранія новыхъ матеріаловъ къ составленію геологической карты Европейской Россіи.

**I. Уральскій хребетъ**

Первый изъ вышепоименованныхъ предметовъ занялъ большую часть нашего времени. Для лучшаго изслѣдованія настоящаго состава Уральскаго хребта, столь по видимому сложнаго, мы проѣхали его въ разныхъ направленіяхъ отъ окрестностей Богословска на сѣверѣ, до его южной оконечности. Путешествуя почти всегда двумя колоннами, мы могли въ одно время изучить Азіатскій и Европейскій его склоны, направляясь иногда, то къ центру хребта, то въ Сибирь, то въ губерніи Пермскую и Оренбургскую. Что касается до сѣвера этого хребта, т. е. отъ Богословска до Златоуста, то трудъ нашъ былъ весьма облегченъ благоразумными мѣрами Горнаго Начальства. Въ каждомъ казенномъ заводѣ намъ были представляемы геологическія, минералогическія и техническія карты, и отличнѣйшіе Офицеры помогали намъ усердно и дѣльно. Совершенно знакомые съ характеромъ окрестныхъ горныхъ породъ, они весьма сократили нашъ трудъ. Оставалось только вывесть изъ этого множества породъ столь различныхъ въ ихъ минералогическомъ составѣ, какую нибудь симметрію, которая, однажды будучи опредѣлена, могла бы служишь

- 149 –

руководствомъ для практическихъ Инженеровъ въ изысканіи минеральныхъ богатствъ.

Въ Уралѣ, какъ и въ другихъ горныхъ хребтахъ, которые мы изучали, осадочныя породы, составляющія главную массу, потерпѣли столько измѣненіи въ первобытномъ характерѣ, отъ изверженія огненныхъ (igneés) веществъ, что представляются не иначе какъ въ измѣненномъ состояніи, и весьма рѣдко сохраняютъ тѣ признаки, по которымъ можно судить объ относительной ихъ древности. А потому вмѣсто того, чтобы повторять все то, что было уже сообщено нашими предшественниками въ изслѣдованіи этой цѣпи, т. е., что она состоитъ изъ породъ кварцевыхъ, слюдистыхъ, хлоритовыхъ, сланцевыхъ или известковыхъ (изъ коихъ большая часть была помѣщена въ первозданныя породы) скажемъ, что не смотря на всѣ измѣненія, которыя потерпѣли эти породы, мы нашли довольно органическихъ веществъ для того, чтобы увѣришься въ осадочномъ ихъ происхожденіи и для опредѣленія ихъ относительной древности. Мы прибавимъ, что кромѣ нѣсколькихъ грядъ гранита различныхъ изверженій породъ серпентиновыхъ, порфировыхъ и діоритовыхъ, которыя прорвали хребетъ въ линіяхъ параллельныхъ его большой оси, и которыя не составляютъ его основной массы, Уралъ, отъ Богословска до своей южной

- 150 –

оконечности, составленъ большею частію изъ породъ осадочныхъ, относящихся къ системамъ: силурійской, девонійской (Old Red Sandstone) и каменноугольной. Большая часть рудниковъ находится въ той или другой изъ помянутыхъ системъ этой великой палезоической эпохи.

Геологическая карта этой цѣпи, которая будетъ составлена для объясненія нашихъ наблюденій, покажетъ постоянное нахожденіе этихъ массъ, то узкими грядами на сѣверѣ Урала, гдѣ онѣ чаще перерываются огненными породами и гдѣ, въ слѣдствіе того, что мы можемъ назвать почти геологическимъ закономъ, онѣ гораздо богаче рудами, то на югѣ Урала, гдѣ онѣ располо жены въ видѣ опахала и представляютъ геологу въ прекрасныхъ отрогахъ полное объясненіе того, что могло быть скрыто на сѣверѣ. Преслѣдуя эти пласты, видя какъ они, то превращаются въ черные доломиты, въ кристаллическіе известняки или въ породы кварцевыя и слюдистыя, то сохраняютъ свой обыкновенный характеръ и даже свои прежнія окаменѣлости, по мѣрѣ какъ удаляются отъ большихъ осей изверженія, мы могли отнести къ силурійской эпохѣ измѣненныя породы, на которыхъ лежатъ нѣкоторыя изъ золотоносныхъ россыпей и въ которыхъ находятся знаменитыя мѣсторожденія желѣзной руды, малахита, мѣди

- 151 –

восточнаго склона; и къ девонійской и каменноугольной эпохѣ различныя, но столь богатыя руды западнаго склона.

Ни какой фактъ въ натуральной исторіи не доказалъ лучше происхожденія металоносныхъ массъ, какъ появленіе различныхъ вулканическихъ породъ, особенно въ точкахъ соприкосновенія ихъ съ осадочными пластами, чрезъ которые онѣ пролагаютъ себѣ путь для выхода на земную поверхность и ни какая страна не представляетъ лучшихъ тому доказательствъ какъ Уралъ. Эта связь нѣкоторыхъ плутоническихъ и осадочныхъ породъ съ драгоцѣнными металами такъ важна, что Инженеръ, который особенно изучитъ ее, можетъ открыть въ этомъ хребтѣ богатства еще неизвѣстныя.

Наши изслѣдованія привели насъ къ обозрѣию, на западномъ склонѣ хребта, большаго ряда пластовъ, которые мы относимъ къ каменноугольной эпохѣ, и мы должны сказать наше мнѣніе, что весьма сомнительно найти тамъ обильную формацію угольную, но вмѣстѣ съ тѣмъ намъ пріятно изъяснить, что нѣкоторые пласты каменнаго угля, нодчиненые песчаникамъ переходящимъ въ кварциты, непосредственно лежащимъ надъ каменноугольнымъ известнякомъ , которые были открыты въ имѣньяхъ Гг. Лазарева и Княгини Бутера, могутъ быть со временемъ

- 152 –

полезны для края. Разные геологическіе факты заставлнютъ насъ думать также, что изысканія въ Артинскомъ бассейнѣ и его окрестностяхъ не были бы безполезны.

**II. Южный каменноугольный край**

Для изслѣдованія края между Днѣпромъ и Дономъ, извѣстнаго подъ именемъ Донецкаго камен ноугольнаго края, мы сначала осмотрѣли его восточныя части, потомъ перерѣзывая его поперегъ отъ юга къ сѣверу вдоль рѣкъ: Міуса, Кринки и Калміуса, и не оставляя безъ вниманія почти ни одного мѣста, гдѣ уголь разработывается, мы посѣтили округи отдаленные къ Дону съ одной стороны и къ Днѣпру съ другой. Къ сѣверу и къ востоку эта почва (занимающая поверхность около 25,000 квадратныхъ верстъ) проходитъ подъ вторичными и третичными осадками, въ которыхъ со временемъ и можно будетъ ее открыть; но къ западу она постепенно уменьшается и, по нашимъ наблюденіямъ, рѣка Волчья, усѣянная первозданными породами, можетъ почитаться ея восточнымъ предѣломъ.

Въ техническомъ и геологическомъ смыслѣ эта почва неравнозначуща съ угольною Формаціею (terrain houillier) Англіи, Бельгіи и Франціи. Покоясь на древнемъ красномъ песчанике (каракуба), тождественномъ съ песчаникомъ Шотландскимъ и сѣверной Англіи, она состоишь изъ весьма развитой нижней и известняковой части

- 153 -

каменноугольной системы. Въ этомъ она можетъ быть сравнена съ нѣкоторыми осадками той же относительной древности въ Нортумберландѣ и западныхъ частяхъ Іоркшира и Дургама, странахъ, гдѣ, какъ на югѣ Россіи, она становится весьма изобильною угольными пластами. Можетъ быть, неумѣстно будетъ съ нашей стороны замѣтить, что, исключая казенныя работы, которыя производятся хорошо, большая часть шахтъ Донецкаго края суть ничто иное, какъ открытыя копи или галлереи, сдѣланныя въ скатахъ горъ. Кромѣ Лисичей Балки, ни гдѣ ничего не сдѣлано для осушки какого бы-то ни было рудника, и потому, какъ только разработка достигаетъ извѣстнаго уровня, ее тотчасъ оставляютъ. Если бъ Англія разработывала только тѣ пласты, которыхъ можно достичъ не выкачивая воды, то она не получила бы сотой части того, что нужно для ея собственнаго употребленія. Не расчитывая издержекъ, которыя повлекутъ за собою осушеніе паровыми машинами, намъ кажется, что во многихъ мѣстахъ края, гдѣ пласты весьма мало наклонены и представляются согнутыми волнообразно, не трудно было бы разработывать уголь, пользуясь разрѣзами долинъ для осушенія сточными каналами.

Въ этомъ краѣ замѣтно нѣсколько осей подъема, направленныхъ почти всегда отъ

- 154 -

О. N. О. къ Е. S. Е; котораго малѣйшіе слѣды видны въ южной части и который съ такою силою дѣйствовалъ къ сѣверу, что каменный уголь часто былъ выдвинутъ на поверхность. Каменноугольные рудники извѣстны только тамъ, гдѣ природа сдѣлала почти все этими подъемами, а потому легко себѣ представить, сколько выгоды можно получить отъ этого края, если преслѣдовать обильные слои чрезъ округи, гдѣ они имѣютъ незначительный склонъ и часто слегка углубляются.

Многія разработки на югѣ Бахмута, и особенно въ Лисичей Балкѣ, совершенно показали и качество угля и множество его пластовъ. Бурения искусно произведенныя, покажутъ тѣ же богатства, больше или меньше развитыя и въ другихъ частяхъ этого края.

Что касается до двухъ видовъ угля, антрацита и обыкновеннаго угля, то намъ казалось ясно, что оба они современны; однимъ словомъ, что въ Новороссійскомъ краѣ, какъ и въ Валлисѣ, тотъ же пластъ угля, смолистый въ одномъ участкѣ, при переходѣ въ другой, становится антрацитомъ. Нѣкоторые изъ этихъ Донецкихъ пластовъ показываютъ дѣйствительно переходъ отъ антрацита къ смолистому, и составляютъ каменный уголь весьма полезный для пароходовъ, тогда какъ чистый

- 155 -

антрацитъ (Поповки и Грушевки) равняется съ лучшимъ антрацитомъ Англіи.

Не излагая подробностей объ этой почвѣ, я предоставляю ссбѣ представить, въ третьей части сего донесенія, нѣкоторыя существенныя различія между ея составомъ и составомъ осадковъ той же эпохи, занимающихъ часть сѣверной Россіи, теперь же я позволяю себѣ сказать только то, что ни какая земля, даже Англія, не представляетъ такого богатаго развитія нижней части каменноугольной системы, какъ Донецкій край.

Наконецъ, по внимательномъ изслѣдованіи всѣхъ частей Имперіи, гдѣ можно было надѣяться встрѣтить каменноугольные пласты, мы рѣшительно убѣждены, что Донецкій край есть единственный (и мы представимъ этому сильнѣйшія причины въ третьемъ отдѣлѣ сего донесенія) представляющій въ своихъ многочисленныхъ пластахъ горючій матеріалъ, полезный для металургіи, и мы прямо можемъ сказать, что съ той минуты, какъ ГОСУДАРЬ ИМПЕРАТОРЪ обратитъ на него свое вниманіе и удостоитъ поощрить заведенія, управляемыя людьми опытными, этотъ край сдѣлается великимъ центромъ народной промышленности.

- 156 -

**III. Общая таблица почвъ Россіи, геологическая карта и проч**

Общая таблица почвѣ Россіи, разрѣзъ отъ Таганрога до Петербурга и эскизъ нашей карты какъ они несовершенны теперь въ своемъ исполненіи (*[[1]](#footnote-1)*) составляютъ графическій результатъ нашихъ трудовъ. Прося Ваше Сиятельство взглянуть на таблицу почвъ, я не войду въ объясненія явленій, представленныхъ намъ верхними осадочными почвами, которыя подали намъ случай сдѣлать любопытныя сравненія съ осадками той же эпохи въ нашихъ странахъ. Я обращу вниманіе на новые пункты въ нижнихъ почвахъ. Въ губерніяхъ Вятской, Пермской и Оренбургской, существуетъ обширная система песчаника, известняковъ, мергелей, гипса и соли. По своему стратиграфическому положенію, эта почва можетъ быть сравнена съ Rothe-todte-Liegende и цехштейномъ Германии. Но ея литологическія и палеонтологическія

- 157 -

различія не позволяютъ намъ отнести ее навѣрно къ къ той или другой изъ этихъ формацій. Обширная степень развитія ея въ Россіи заставляетъ насъ почитать се лучшимъ или истиннымъ образцомъ осадковъ этой эпохи, разсѣянныхъ тамъ и сямъ отдѣльно въ Европѣ. Вотъ почему мы предлагаемъ имя Пермской системы, имя, которое, мы надѣемся, будетъ принято геологами другихъ странъ, потому что оно лучше старыхъ названій.

Эта формація, въ которой находятся извѣстныя вамъ многочисленныя мѣстонахожденія мѣди, отличается большимъ количествомъ органическихъ тѣлъ, которыя почти всѣ неизвѣстны, но которыя своими главными чертами указываютъ на близость каменноугольной почвы. Самый обильный и самый отличительный есть тотъ, который мы назвали *Рrоductus Сапсrіпі*.

Что касается до каменноугольной почвы сѣверной Россіи, наши настоящія излѣдованія подтвердили разительно справедливость нашего мнѣнія въ прошедшемъ году. Отличаясь почти совершенно составомъ отъ прекрасной южной каменноугольной почвы, единственнымъ представителемъ каменнаго угля, она имѣетъ полосу лежащую въ нижнихъ ярусахъ и имѣющую положеніе каменноугольной Валдайской полосы, столь хорошо описанной Подполковникомъ Гельмерсеномъ. Она лежитъ, какъ и тамъ (смотри разрѣзъ отъ Таганрога до С. Петербурга) на древнѣйшей Формаціи, называется (Old Red Sandstone) или девоніанская, которая поднимается къ

- 158 -

югу Тулы и Калуги, и которая, согласно съ физическою географіею страны, занимаетъ широкій поясъ болѣе 150-ти верстъ отъ юга къ сѣверу отъ истоковъ Оки до Лихвина. Разрѣзъ Дона чрезъ Воронежъ, сдѣланный Графомъ Кейзерлингомъ, далъ тѣ же результаты и доказала ростяженіе этой девоніянской оси къ востоку. Его наблюденія, какъ и наши, подтверждаютъ этотъ важный фактъ, что все, что есть каменноугольнаго къ сѣверу, лежитъ въ большемъ углубленіи, которое мы называемъ и «Московскій бассейнъ». Въ ученомъ смыслѣ это открытіе представило намъ много любопытнаго, объяснивъ намъ причину большихъ различій, существующихъ между Московскимъ и Донецкимъ бассейномъ. Эти два бассейна, отдѣленные другъ отъ друга съ глубокой древности, были наполнены и засыпаны подъ морями, которыя имѣли различные берега и различные притоки, которые, будучи подчинены различнымъ условіямъ, дали необходимо мѣсто различнымъ осадкамъ. Но я хочу обратишь особенное вниманіе Вашего Сиятельства на общественную пользу этого открытія, потому что оно дастъ намъ средство опредѣлить точные предѣлы сѣверной каменноугольной полосы, но одобряя недавнія старания, сдѣланныя для узнанія мѣстонахожденій горючаго матеріала въ окрестностяхъ Тулы и Калуги, гдѣ существуетъ каменный уголь удобно

- 159 -

разработываемый съ выгодою для извѣстныхъ нуждъ края, мы не можемъ скрыть, что это ископаемое почти то же, которое существуетъ въ Валдаѣ, и что за предѣломъ, который мы означаемъ, всякое усиліе отыскать каменный уголь было бы безплодно.

Здѣсь-то можно усмотрѣть практическую сторону нашей науки и я смѣю надѣяться, пользу примѣненія къ Россіи тѣхъ началъ классификаціи, которые я изложилъ въ сочиненіи поднесенномъ Его Величеству.

Изучая различія, существующія между каменноугольными почвами сѣверной и южной Россіи, можно сказать, что Россія представляетъ тѣ же явленія, какъ и Великобританія въ Ирландіи и во многихъ мѣстахъ Англіи: каменноугольный известнякъ или нижніе слои системы, содержатъ горючія вещества, которыя, какъ Валдайскія и Калужскія, полезны только для домашнихъ употребленій и нѣкоторыхъ заводовъ, тогда какъ въ другихъ округахъ моего отечества, та же формація, измѣняя свой литологическій характеръ, становится большимъ и богатымъ запасомъ каменнаго угля, какъ на Донцѣ.

Въ заключеніе прошу Ваше Сиятельство позволить сказать мнѣ, что составленіе предполагаемаго нами сочиненія займетъ насъ довольно долго, по разсмотрѣнію, сравненію и описанію породъ, нами собранныхъ, и но приготовленію разрѣзовъ и

- 160 -

картъ. Мы обратимъ на это все наше вниманіе, и съ помощію нашихъ Русскихъ сотрудниковъ, мы надѣемся представить Его Величеству трудъ, который будетъ свидѣтельствомъ нашего желанія принести пользу Россіи. Между тѣмъ я прошу Ваше Сиятельство представить Его Величеству наши первые очерки, какъ доказательство успѣха экспедиціи, которую Его Величеству угодно было поощрить, и какъ увѣреніе, что высокое покровительство Его, отстранивъ для насъ всякое препятствіе, въ предѣлахъ Его обширной имперіи, дало намъ возможность достичь общихъ выводовъ, для успѣха науки существенныхъ.

2.

**Геологическія наблюденія въ Россіи.**

Письмо Г. Мурчисона къ Г. Фишеру Фонъ Вальдгему.

Переводъ Поручика Кокшарова.

Такъ какъ г.ы принимали самое живое участіе въ успѣхахъ геологической экспедиціи, выполненной нынѣ мною вмѣстѣ съ друзьями моими Г. де Вернелемъ, Графомъ Кейзерлингомъ и Поручикомъ Кокшаровымъ; то я постараюсь вамъ сообщить

- 161 -

нѣкоторые изъ главныхъ результатовъ нашего путешествія. Прося васъ предоставить эти краткія свѣдѣнія почетному обществу Московскихъ натуралистовъ, сдѣлавшихъ мнѣ честь избраніемъ меня въ число своихъ иностранныхъ членовъ, я исполняю мое намѣреніе тѣмъ съ большимъ удовольствіемъ.

Существованіе въ сѣверной Россіи системъ силурской, девоніянской и каменноугольной, вамъ уже извѣстно по извлеченіямъ, сдѣланнымъ изъ нашихъ записокъ и помѣщеннымъ въ изданіяхъ Лондонскаго и Парижскаго геологическихъ обществъ. Цѣль нашего путешествія въ нынѣшнемъ году была слѣдующая:

1) Изслѣдовать порядокъ напластованія, отношенія и географическое распредѣленіе верхнихъ осадочныхъ породъ.

2) Изслѣдовать Уральскій хребетъ такъ, чтобы имѣть возможность ясно видѣть, въ какомъ порядкѣ подняты горизонтальныя формации плоскаго пространства России.

3) Изслѣдовать Формацію Донецкаго кряжа, изобилующую угольными пластами, и смѣжныя съ нею породы южной Россіи.

Мы уже опредѣлили, по возможности, прошедшаго года, границы огромнаго бассейна каменноугольной системы центральной Россіи. Нынѣшняго года мы прибавили къ этому только свѣдѣнія о приподнятой толще, образующей при Самарѣ почти большой

- 162 -

островъ Волги, породы котораго преисполнены фузулинали (fusulines) и обнажены весьма глубокими размывами. Породы эти относятся къ верхнимъ ярусамъ каменноугольнаго известняка, весьма отличительнаго въ геологіи Россіи.

Почва каменноугольная вообще покрыта свитою пластовъ мергелеватыхъ, глинистыхъ, известковыхъ и песчаныхъ, свитою, когпорой мы предлагаемъ дашь названіе «Пермской системы». Хотя система эта по своимъ общимъ признакамъ представляетъ собою формации Rothe todt liegende, цехштейна и другихъ, однако же ея невозможно положительно отнести къ тому или другому изъ Немецкихъ раздѣленій, ни по окаменелостямъ, ни по природѣ породъ. Классификація Англійская, въ слѣдствіи которой мы бы могли отнести помянутую группу къ нижнимъ ярусамъ Формаціи новаго краснаго песчаника (Nouveau Grès Rouge) не болѣе оказываетъ услуги. Названіе новый красный песчаникъ чисто минералогическое, и потому также несоотвѣтственно огромнымъ толщамъ мергелей, бѣлымъ и желтымъ известнякамъ и сѣроватымъ песчаникамъ, какъ названіе Old Red (древній красный песчаникъ) породамъ чернаго цвета и сланцеватымъ Девоншира. Къ системѣ Пермской нами

- 163 -

причислены главнѣйшіе осадки гипса Арзамаса, рѣки Піаны, Казани, рѣкъ Камы и Сылвы, Уфы и окрестностей Оренбурга; соляные источники Сергіевска и другихъ мѣстъ Оренбургской губерніи, а равномѣрно всѣ мѣдные рудники, огромные обломки деревьевъ и окаменѣлыя растенія, которымъ вы уже сдѣлали перечень въ *Bulletin* вашего общества (1840 года).

Въ красныхъ осадкахъ, занимающихъ обширный бассейнъ губерній Вологодской и Нижегородской, мы не нашли другихъ органическихъ остатковъ, кромѣ дурно сохранившихся маленькихъ Cypris и Bivalѵе, но судя по толщинѣ осадковъ, ихъ распредѣленію и минералогическимъ признакамъ, намъ кажется, что они будутъ нѣкогда сравнены съ Нѣмецкимъ тріасомъ (Trias). Мы тѣмъ болѣе убѣждены въ этомъ предположеніи, что Графъ Кейзерлингъ открылъ въ горѣ Богдо, лежащей посреди Киргизской степи, нѣкоторыя окамеиѣлости, совершенно неизвѣстныя въ другихъ частяхъ Россіи, и которыя встрѣчаются вмѣстѣ съ *Ammonites bogdoanus*, описаннымъ уже Г. Бухомъ. Этотъ знаменитый ученый относить *Ammonites bogdoanus* къ формаціи раковистаго известняка.

Настоящій ліасъ, кажется, не существуетъ въ Россіи, но какъ публиковалъ Г. Бухъ въ своемъ послѣднемъ увражѣ, юрская почва Россіи составлена изъ двухъ частей, изъ

- 164 -

которыхъ верхняя является во многихъ мѣстахъ Донецкаго кряжа ([[2]](#footnote-2)*). Эtа часть представляется почти всегда въ видѣ оолитоваго известняка и заключаетъ въ себѣ многія окамснелости, какъ то: Nerineas, Trigonias и другія, уже вами описанныя и которыя позволяютъ сравнить ея съ верхними ярусами юрской почвы Германии и съ Портландскимъ и коралловымъ известняками моего отечества.

Нижняя часть Юры, гораздо болѣе развитая, не покрываетъ однако же собою безпрерывно весьма бЬлыпихъ пространствъ, но разсѣяна тамъ и сямъ клочками, а въ нѣкоторыхъ мѣстахъ прикрыта новѣйшими формациями. Начиная отъ восточнаго склона Урала, отъ 64°, до Каспійскаго моря, она сохраняетъ почти одинъ и тотъ же минералогическій характеръ и тѣ же окаменѣлости. Осадки, занимающіе это пространство, суть средній и нижній ярусы юрской почвы. Сюда относятся ваши Московскіе желѣзистые пески, ваши песчаники и черныя глины, которымъ подобныя мы уже видѣли прошедшаго года на Волгѣ, между Костромою и Кинешмою, при Макарьевѣ на Унжѣ и которые мы снова встрѣтили нынѣшняго года во многихъ мѣстахъ; преимущественно между Арзамасомъ и Симбирскомъ, между Сызранью и Саратовымъ, при Сарапулѣ и на рѣкѣ Илекъ въ окрестностяхъ Оренбурга.

- 165 -

Почва меловая хотя составлена изъ разнородныхъ ярусовъ, какъ например Бѣлаго мѣла, мергеля и песчаника, но не смотря на то она не содержитъ другихъ окаменѣлостей кромѣ находящихся въ бѣломъ мѣлу западной Европы. *Catillus*, *Belemnites mucronatus*, *Ostrea vesicularis*, и *Terebratula carnea*, кажется, можно встрѣтить во всѣхъ ярусахъ.

Надъ белымъ меломъ мы не нашли нуммулитнаго известняка (calcaire nummulitique), который начинается въ крыму и который становится весьма замѣчательнымъ простираясь въ Грузію, Египетъ и южную Европу ([[3]](#footnote-3)**). Также члены, соотвѣтствующіе нижнимъ ярусамъ третичной почвы (periode éocène) кажется у васъ въ Россіи не существуютъ, но въ замѣнъ того средніе и нижніе третичные ярусы (Miocene, Pliocene) занимаютъ весьма более поверхности какъ на Волгѣ (Антиповка), такъ въ Подоліи и Большій, а равномѣрно и въ мѣстахъ окружающихъ моря Азовское и Черное, гдѣ они являются осадками болѣе новѣйшими. Время не позволяетъ мнѣ бесѣдовать съ вами о многочисленныхъ и интересныхъ феноменахъ Урала, для

- 166 -

изслѣдованія котораго мы употребили около 3-хъ мѣсяцевъ. Мы производили наблюденія надъ удивительными золотоносными россыпями, надъ положеніемъ вашихъ огромныхъ животныхъ и постигали тайну метаморфизма (измѣненія) осадочныхъ пород, въ чемъ Уралъ представляетъ прекрасные примѣры, для лучшаго изученія которыхъ всегда должно обращаться къ превосходнымъ сочиненіямъ Гг. Гумбольдта и Густава Розе.

Я вамъ скажу только, что этотъ хребетъ весьма далекъ отъ того, чтобы почитать его однимъ изъ самыхъ древнихъ. Онъ состоитъ, кромѣ породъ извергнутыхъ, изъ осадковъ силурскихъ, девоніянскихъ и каменноугольныхъ, болѣе или менѣе измѣненныхъ, что впрочемъ не воспрепятствовало намъ отыскать въ нихъ (при томъ во многихъ мѣстахъ) нашъ *Pentamerus knighti* и другія окаменѣлости и такимъ образомъ найти средство судить довольно положительно объ его древности. Помянутыя породы Урала расположены параллельными полосами и почти симметрически по обоимъ его склонамъ, а въ южной его части они представляются развернутыми въ видѣ опахала, будучи перемѣшаны съ порфирами, дѣйствіе которыхъ частію превращало ихъ въ яшму.

Еще менѣе я намѣренъ вамъ сообщить о формаціи Донецкаго кряжа,

- 167 -

изобилующей пластами каменнаго угля, ибо не входя въ подробности относительно ея обширности, толщины (столь важной для будущаго блага Россіи) и прочихъ обстоятельствъ, я не отдамъ ей должной справедливости. Выразясь геологически, можно сказать кратко, что всѣ многочисленные пласты угля этой системы подчинены каменноугольному известняку (Mountain limestone and grit) и что формации, извѣстной въ Англіи подъ именемъ угольной (terrain houiller) въ Донецкомъ кражѣ не существуетъ въ полномъ смыслѣ этого слова (какъ уже было сказано Г. Ейхвальдомъ).

Мнѣ остается говоришь съ вами объ одномъ, весьма интересномъ открытіи, которое мы сдѣлали съ Графомъ Кейзерлингомъ, возвращаясь въ Москву по двумъ различнымъ дорогамъ чрезъ Воронежъ и Орелъ (Донъ и Ока). Вообще до сихъ норъ думали, что Россія отъ сѣвера къ югу представляетъ систему осадковъ, которые съ приближеніемъ къ югу становятся постепенно новѣйшими, т. е., что древнія формации сѣверной Россіи, приближаясь къ югу, прикрываются болѣе и болѣе новѣйшими, оканчивающимися тамъ, гдѣ каменноугольная почва Донецкаго кряжа выдвинута изъ подъ нихъ породами гранитными и плутоническими южной степи. Но это не такъ - Огромная ось девоніянской почвы, имѣющая около 150-nи верстъ ширины, пересѣкаеть центральную

- 168 -

Россію на широтѣ губерній Воронежской и Орловской, направляясь ко O.N.O, чтобы соединиться, вѣроятно, съ породами одинаковой древности въ Литвѣ и Курляндіи. Эпю открытіе тѣмъ болѣе для насъ драгоцѣнно, что найденная нами нынѣшнею вѣсною полоса силурской почвы (при Шабли въ Литвѣ) находится на той же линіи поднятія. Важность этого не скрывается отъ вашей проницательности и вы конечно уже угадываете слѣдствія. Описанная ось девоніянской системы указываетъ ясно причину столь великаго различія между осадками каменноугольнаго бассейна Донецкаго кряжа и бассейна вашего обширнаго Московскаго пространства; ибо два моря, въ которыхъ образовались эти осадки, будучи раздѣлены между собою землями еще во времена весьма отдаленныя, и такимъ образомъ имѣя различные одно отъ другаго берега, различные притоки и различные истоки, отъ которыхъ преимущественно зависитъ природа морскихъ осадковъ, могли и должны были образовать осадки различные.

Наше открытіе съ другой стороны изъясняетъ совершенное сходство двухъ береговъ Московскаго бассейна. Въ губерніяхъ Калужской и Тульской, такж е какъ и въ Валдаѣ, девоніянскія породы, характеризуемыя остатками рыбъ

- 169 -

*Holoptychius nobilissimus*, проходя подъ каменноугольною системою, служатъ основаніемъ пластамъ каменнаго угля (сопровождаемаго *Productus gigas*), которые теперь составляютъ предметъ изученія и розысканій правительства.

Васъ удивитъ огромное пространство нами изслѣдованное, если я не поспѣшу вамъ сказать, что экспедиціи оказывалъ свое покровительство Графъ Канкринъ, и что были сдѣланы предварительно необходимыя распоряженія людьми весьма просвѣщенными, притомъ много способствовало успѣху радушіе и гостепріимство, свойственное Русскимъ и въ особенности жителямъ Урала. Такимъ образомъ устранены были всѣ препятствія и доставлены всѣ возможныя удобства къ путешествію.

Мы будемъ имѣть честь доставить вамъ со временемъ, вмѣстѣ съ нашимъ описаніемъ, общую таблицу порядка напластованія геологическихъ почвъ Россіи, которую мы уже приготовляемъ, а также разрѣзы и карты ([[4]](#footnote-4)*).

Примите, милостивый государь и любезный товарищъ, увѣренія въ искреннихъ чувствахъ совершенно вамъ преданнаго.

1. * Таблица и разрѣзъ взяты обратно Г. Мурчисономъ, съ тѣмъ, что, по надлежащемъ ихъ пополненіи и точнѣйшей провѣркѣ, они будутъ изданы имъ въ непродолжительное время и въ новомъ улучшенномъ видѣ. [↑](#footnote-ref-1)
2. * Смотри описаніе Г. Бледе. [↑](#footnote-ref-2)
3. ** Я получилъ образцы нуммулитовъ изъ Елисаветграда почему можно предполагать, что Крымская система продолжается до южной покатости гранитной степи юга. [↑](#footnote-ref-3)
4. * Я видѣлъ эту таблицу, составленную по совершенно новымъ началамъ, нѣкоторые карты, разрѣзы и проч. Все это приготовлено съ такимъ знаніемъ дѣла, что не остается желать ничего болѣе. Ф. фонъ В. [↑](#footnote-ref-4)
